# Supplementary material for: Porphyrin–bile acid conjugates: from saccharide recognition in the solution to the selective cancer cell fluorescence detection
Source: Royal Society of Chemistry journal article supplement (doi:10.1039/b717528k), 2008-01-01

## Porphyrin – bile acid conjugates: from saccharide recognition in the solution to the selective cancer cell fluorescence detection

Jarmila Králová<sup>a\*</sup>, Juha Koivukorpi<sup>b</sup>, Zdeněk Kejík<sup>c</sup>, Pavla Poučková<sup>d</sup>, Elina Sievänen<sup>b</sup>, Erkki Kolehmainen<sup>b</sup> and Vladimír Král<sup>c,e\*</sup>

### Supplementary Information

**Figures 1-3** describes dependence of absorption on the concentration for tested probes 1-4 in water, and mixed solvents.

In any case, validity of the Lambert-Beer-Law for these porphyrins is observed.

LB is valid in tested concentration range for all receptors and solvents used in study, with coefficient  $R^2$  higher than 0,99.

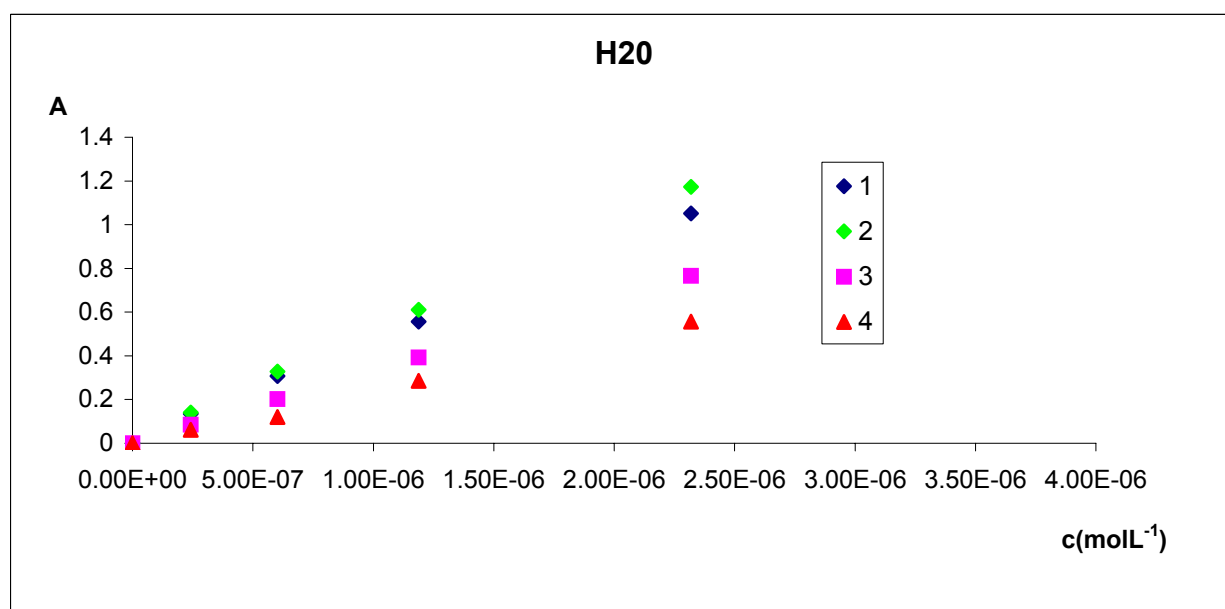

### H<sub>2</sub>O:DMSO 2:1

A

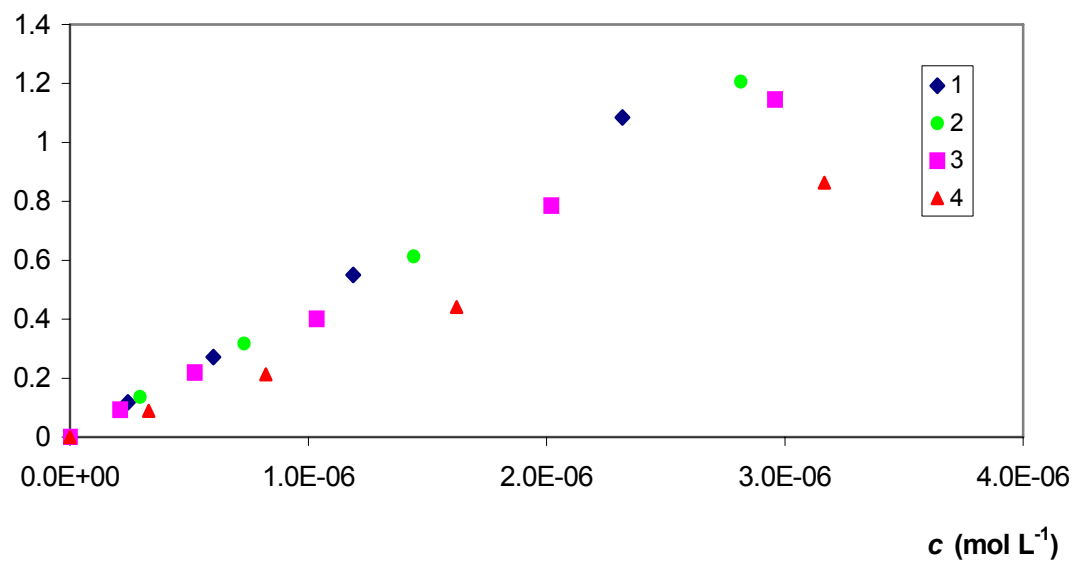

### H<sub>2</sub>O:MeOH 2:1

A

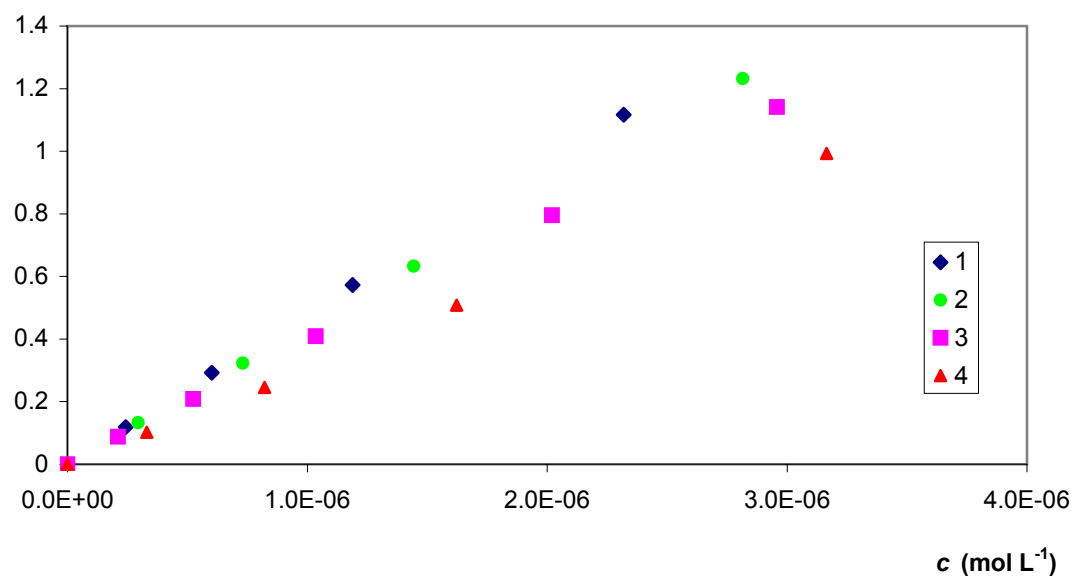

Supplement: b717528k.pdf [file b717528k.pdf]
